# Supplementary material for: Cannabis use and workplace cannabis availability, perceptions and policies among Canadian workers: a comparison before and after the legalisation of non-medical cannabis
Source: HighWire-hosted journal article supplement (doi:10.1136/oemed-2022-108316), 2022-07-18
Supplement: oemed-2022-108316supp001_data_supplement.pdf [file oemed-2022-108316supp001_data_supplement.pdf]

**Supplementary Table 1.** Personal and work-related characteristics of all working survey respondents at time 1 (before legalization) and time 2 (after legalization)

| Characteristics                                   | Time 1 (Before Legalization)         | Time 2 (After Legalization)                                        |                                                             |
|---------------------------------------------------|--------------------------------------|--------------------------------------------------------------------|-------------------------------------------------------------|
|                                                   | T1 Respondents<br>(n=2,011)<br>n (%) | Respondents<br>Participating<br>at T1 and T2<br>(n=1,030)<br>n (%) | Replenishment<br>Respondents<br>at T2<br>(n=3,002)<br>n (%) |
| <b>Age in years, mean (SD)</b>                    | 44.1 (12.5)                          | 47.6 (11.4)                                                        | 42.5 (12.7)                                                 |
| <b>Sex</b>                                        |                                      |                                                                    |                                                             |
| Female                                            | 895 (44.5)                           | 411 (39.9)                                                         | 1498 (49.9)                                                 |
| Male                                              | 1115 (55.5)                          | 619 (60.1)                                                         | 1495 (49.8)                                                 |
| Missing                                           | 1 (0.1)                              | 0                                                                  | 9 (0.3)                                                     |
| <b>Region of residence</b>                        |                                      |                                                                    |                                                             |
| British Columbia/Yukon                            | 252 (12.5)                           | 119 (11.6)                                                         | 318 (10.6)                                                  |
| Alberta                                           | 240 (11.9)                           | 137 (13.3)                                                         | 347 (11.6)                                                  |
| Saskatchewan/Manitoba                             | 151 (7.5)                            | 78 (7.6)                                                           | 199 (6.6)                                                   |
| Ontario                                           | 749 (37.3)                           | 391 (38.0)                                                         | 1184 (39.4)                                                 |
| Quebec                                            | 449 (22.3)                           | 223 (21.7)                                                         | 715 (23.8)                                                  |
| Atlantic Region                                   | 170 (8.5)                            | 82 (8.0)                                                           | 239 (8.0)                                                   |
| <b>Highest education achieved</b>                 |                                      |                                                                    |                                                             |
| High school diploma or below                      | 244 (12.1)                           | 108 (10.5)                                                         | 464 (15.5)                                                  |
| At least some post-secondary education            | 1761 (87.6)                          | 921 (89.4)                                                         | 2527 (84.2)                                                 |
| Missing                                           | 6 (0.3)                              | 1 (0.1)                                                            | 11 (0.4)                                                    |
| <b>Self-rated general health</b>                  |                                      |                                                                    |                                                             |
| Good/Fair/Poor                                    | 869 (43.2)                           | 442 (42.9)                                                         | 1315 (43.8)                                                 |
| Very Good/Excellent                               | 1138 (56.6)                          | 586 (56.9)                                                         | 1683 (56.1)                                                 |
| Missing                                           | 4 (0.2)                              | 2(0.2)                                                             | 4 (0.1)                                                     |
| <b>Current frequency of cigarette smoking</b>     |                                      |                                                                    |                                                             |
| Not at all                                        | 1670 (83.0)                          | 890 (86.4)                                                         | 2494 (83.1)                                                 |
| Occasionally                                      | 124 (6.2)                            | 50 (4.9)                                                           | 200 (6.7)                                                   |
| Daily                                             | 213 (10.6)                           | 88 (8.5)                                                           | 297 (9.9)                                                   |
| Missing                                           | 4 (0.2)                              | 2(0.2)                                                             | 11 (0.4)                                                    |
| <b>Past-year frequency of alcohol consumption</b> |                                      |                                                                    |                                                             |
| Never/Less than once a month                      | 498 (24.8)                           | 280 (27.2)                                                         | 895 (29.8)                                                  |
| 1 to 3 times per month                            | 539 (26.8)                           | 240 (23.3)                                                         | 804 (26.8)                                                  |
| 1 to 3 times per week                             | 651 (32.4)                           | 345 (33.5)                                                         | 891 (29.7)                                                  |
| ≥4 times per week                                 | 301 (15.0)                           | 162 (15.7)                                                         | 403 (13.4)                                                  |
| Missing                                           | 22 (1.1)                             | 3 (0.3)                                                            | 9 (0.3)                                                     |
| <b>Usual hours worked per week, mean (SD)</b>     | 38.0 (8.1)                           | 38.2 (7.2)                                                         | 38.1 (8.6)                                                  |

| Characteristics                                                                                                  | Time 1 (Before Legalization) | Time 2 (After Legalization)                               |                                                    |
|------------------------------------------------------------------------------------------------------------------|------------------------------|-----------------------------------------------------------|----------------------------------------------------|
|                                                                                                                  | T1 Respondents<br>(n=2,011)  | Respondents<br>Participating<br>at T1 and T2<br>(n=1,030) | Replenishment<br>Respondents<br>at T2<br>(n=3,002) |
|                                                                                                                  | n (%)                        | n (%)                                                     | n (%)                                              |
| <b>Usual work schedule</b>                                                                                       |                              |                                                           |                                                    |
| Regular day, evening or night shift                                                                              | 1688 (83.9)                  | 888 (86.2)                                                | 2465 (82.1)                                        |
| Non-regular shift (e.g., rotating, split, on call, irregular)                                                    | 318 (15.8)                   | 140 (13.6)                                                | 531 (17.7)                                         |
| Missing                                                                                                          | 5 (0.3)                      | 2 (0.2)                                                   | 6 (0.2)                                            |
| <b>Job tenure, mean (SD)<sup>a</sup></b>                                                                         | 10.2 (9.4)                   | 11.8 (9.8)                                                | 9.1 (9.0)                                          |
| <b>Has a permanent job</b>                                                                                       |                              |                                                           |                                                    |
| Yes                                                                                                              | 1785 (88.8)                  | 933 (90.6)                                                | 2615 (87.1)                                        |
| No                                                                                                               | 215 (10.7)                   | 96 (9.3)                                                  | 374 (12.5)                                         |
| Missing                                                                                                          | 11 (0.6)                     | 1 (0.1)                                                   | 13 (0.4)                                           |
| <b>Performed hazardous work tasks weekly</b>                                                                     |                              |                                                           |                                                    |
| Yes                                                                                                              | 774 (38.5)                   | 351 (34.1)                                                | 1112 (37.0)                                        |
| No                                                                                                               | 1230 (61.2)                  | 678 (65.8)                                                | 1880 (62.6)                                        |
| Missing                                                                                                          | 7 (0.4)                      | 1 (0.1)                                                   | 10 (0.3)                                           |
| <b>Workplace size</b>                                                                                            |                              |                                                           |                                                    |
| 5-19                                                                                                             | 344 (17.1)                   | 173 (16.8)                                                | 558 (18.6)                                         |
| 20 to 99                                                                                                         | 635 (31.6)                   | 317 (30.8)                                                | 875 (29.2)                                         |
| 100 to 499                                                                                                       | 501 (24.9)                   | 257 (25.0)                                                | 764 (25.5)                                         |
| ≥500                                                                                                             | 531 (26.4)                   | 283 (27.5)                                                | 805 (26.8)                                         |
| <b>Industry</b>                                                                                                  |                              |                                                           |                                                    |
| Arts, retail trade, accommodations                                                                               | 235 (11.7)                   | 86 (8.4)                                                  | 404 (13.5)                                         |
| Health care and social assistance                                                                                | 218 (10.8)                   | 124 (12.0)                                                | 384 (12.8)                                         |
| Education                                                                                                        | 294 (14.6)                   | 173 (16.8)                                                | 388 (12.9)                                         |
| Manufacturing, trade, transportation, warehousing                                                                | 277 (13.8)                   | 154 (15.0)                                                | 372 (12.4)                                         |
| Primary industry (including construction)                                                                        | 208 (10.3)                   | 95 (9.2)                                                  | 354 (11.8)                                         |
| Other (including information, technology, finance, administrative, professional, science, public administration) | 752 (37.4)                   | 389 (37.8)                                                | 1076 (35.8)                                        |
| Missing                                                                                                          | 27 (1.3)                     | 9 (0.9)                                                   | 24 (0.8)                                           |
| <b>Survey Mode</b>                                                                                               |                              |                                                           |                                                    |
| Phone                                                                                                            | 364 (18.1)                   | 348 (33.8)                                                | 848 (28.3)                                         |
| Online                                                                                                           | 1647 (81.9)                  | 682 (66.2)                                                | 2154 (71.8)                                        |

<sup>a</sup> Data on job tenure was missing for 43 respondents (n=24 for those at Time 1, n=19 for those at Time 2 [n=1 among respondents participating at T1 and T2 and n=18 among replenishment respondents]).

Abbreviations: SD, standard deviation; T1, time 1; T2, time 2.
